# Supplementary material for: Dissection of the Genetic Architecture for Quantities of Gliadins Fractions in Wheat (Triticum aestivum L.)
Source: Front Plant Sci. 2022 Mar 24;13:826909. doi: 10.3389/fpls.2022.826909 (PMC8988047; doi:10.3389/fpls.2022.826909)
Supplement: Supplementary file 6 [file Data_Sheet_1.xlsx]

## Sheet: Table S1 Divergence btw two P
Table S1 Gliadin contents (total and individual fractions) in the two parents of the RIL population
Varieties	Content (106AU/mg)
	Gli	ω	α	γ
Luozhen No.1（A）	63.34***	11.57*	32.17***	19.61**
Zhengyumai9987（B）	45.75	8.74	21.67	15.33
B/A（%）	72.23	75.54	67.36	78.17
*, ** and *** represented the P value of <0.05, <0.01 and <0.001 level, respectively.

## Sheet: Table S2 Phenotypic variation
Table S2 Phenotypic variations and variance components of the RIL population at two locations across 2 years
Traits	Environment		Content of two Parents (106AU/mg)			RIL population
			Luozhen No.1	Zhengyumai 9987		Range	Mean±SD	Variation Coefficient	kurtosis	skewness
Gli	E1		62.22	45.75		41.81 ~ 91.43	60.10 ± 9.85	0.16	0.11	0.43
	E2		59.87	39.66		41.04 ~ 95.16	62.66 ± 9.97	0.16	-0.11	0.38
	E3		65.23	52		40.41 ~ 85.67	59.63 ± 9.03	0.15	-0.16	0.34
	E4		66.05	45.6		31.23 ~ 94.50	60.02 ± 12.24	0.2	0.52	0.52
	Mean		63.34	45.75		41.70 ~ 88.65	60.6 ± 8.88	0.15	0.18	0.44
ω	E1		13.27	8.73		4.95 ~ 20.15	11.75 ± 2.81	0.24	0.19	0.61
	E2		10.41	6.79		3.29 ~ 20.54	11.38 ± 2.79	0.24	0.53	0.54
	E3		12.35	11.46		3.42 ~ 20.26	11.17 ± 2.57	0.23	0.82	0.61
	E4		10.25	7.99		2.98 ~ 21.90	11.01 ± 3.27	0.3	1.43	1.03
	Mean		11.57	8.74		4.23 ~ 18.73	11.33 ± 2.37	0.21	0.73	0.58
α	E1		29.86	21.95		20.85 ~ 47.31	30.28 ± 5.12	0.17	0.09	0.47
	E2		30.69	19.63		20.76 ~ 47.58	32.16 ± 5.13	0.16	0.09	0.59
	E3		33.06	22.99		19.67 ~ 43.72	29.81 ± 4.81	0.16	-0.02	0.5
	E4		35.06	22.12		16.15 ~ 45.39	30.28 ± 6.17	0.2	0.06	0.41
	Mean		32.17	21.67		21.46 ~ 43.29	30.63 ± 4.58	0.15	-0.02	0.51
γ	E1		19.09	15.06		9.43 ~ 27.19	18.08 ± 3.10	0.17	-0.18	0.03
	E2		18.77	13.24		11.02 ~ 29.93	19.12 ± 2.99	0.16	0.15	0.17
	E3		19.82	17.55		9.60 ~ 27.24	18.65 ± 2.74	0.15	0.4	0.08
	E4		20.75	15.48		9.68 ~ 28.79	18.73 ± 3.59	0.19	0.49	0.13
	Mean		19.61	15.33		9.93 ~ 27.89	18.64 ± 2.73	0.15	0.39	0.07

## Sheet: Table S3 QTL detected
Table S3 QTL for gliadin contents (total and individual fractions) in the RIL population at two locations across 2 years
Traits	QTL	Environment	Peak Position (cM)	CI(CM)	Flanking whaass	LOD	PVE(%)	Additive Effect
Glia	QGli.1AS-1	E2	4.72	0.00 ~ 9.43	whaas291 ~ whaas430	2.98	3.57	-2.17
	QGli.1DS-1	BLUP	4.58	0.00 ~ 9.16	whaas14716 ~ whaas14882	3.03	3.86	-1.6
	QGli.1DL-2	BLUP	41.66	41.51 ~ 41.81	whaas16172 ~ whaas16200	3.04	3.93	-1.62
	QGli.2DL-1	E4	65.47	65.33 ~ 65.61	whaas41789 ~ whaas41800	3.32	6.52	-3.19
	QGli.3DL-1	E3	92.77	92.48 ~ 93.05	whaas73763 ~ whaas73846	2.8	6.02	2.25
	QGli.4AL-1	E1	67.64	67.20 ~ 68.08	whaas79961 ~ whaas79953	3.03	2.98	1.97
	QGli.4AL-2	E2 BLUP	101.71	101.17 ~ 102.25	whaas80354 ~ whaas80430	3.32 ~ 3.73	4.27 ~ 5.22	1.69 ~ 2.63
	QGli.4DS-1	E1 BLUP	17.55	10.49 ~ 24.61	whaas87639 ~ whaas87707	3.66 ~ 4.81	5.74 ~ 6.81	1.96 ~ 2.98
	QGli.6AS-3	E1 BLUP	62.99	60.15 ~ 65.83	whaas115192 ~ whaas115221	4.58 ~ 6.47	6.21 ~ 9.16	-2.84 ~ -2.47
	QGli.6AS-4	E2	77.57	77.10 ~ 78.03	whaas115395 ~ whaas115424	4.53	5.47	-2.69
	QGli.6DS-1	E1	26.38	25.09 ~ 27.67	whaas136338 ~ whaas136402	3.65	5.17	-2.59
	QGli.6D-2	E2 E3 BLUP	45.43	40.74 ~ 50.11	whaas136878 ~ whaas137562	3.91 ~ 4.77	5.48 ~8.55	-2.69 ~ -2.05
	QGli.7AS-2	E2	34.3	34.15 ~ 34.44	whaas139248 ~ whaas139252	3.82	5.36	-2.66
	QGli.7DS-1	E1 E2 E4 BLUP	44.09	42.20 ~ 45.97	whaas165320 ~ whaas165374	3.34 ~ 8.14	5.55 ~ 12.07	2.69 ~ 3.33
	QGli.7DL-3	E4 BLUP	72.79	71.58 ~ 73.99	whaas166927 ~ whaas167040	2.75 ~ 3	3.7 ~ 6.27	-3.13 ~ -1.57
ω	Qω.1AS-1	E2	4.72	0.00~ 9.43	whaas291 ~ whaas430	4.31	8.66	-0.84
	Qω.1DL-3	E3 BLUP	103.59	100.3 ~ 106.88	whaas16947 ~ whaas16960	2.94 ~ 3.35	5.66 ~ 5.8	-0.65 ~ -0.49
	Qω.2AS-1	E1	31.55	31.41 ~ 31.69	whaas17922 ~ whaas17921	2.59	4.41	-0.64
	Qω.4AL-2	E2 BLUP	101.71	101.17 ~ 102.25	whaas80354 ~ whaas80430	4.10 ~ 4.18	6.58 ~ 7.27	0.53 ~ 0.77
	Qω.4DS-1	E1 BLUP	17.55	10.49 ~ 24.61	whaas87639 ~ whaas87707	3.27 ~ 3.49	7.87 ~ 8.02	0.58 ~ 0.87
	Qω.5DL-1	E2 E3 BLUP	29.63	29.22 ~ 30.04	whaas113335 ~ whaas113371	2.55 ~ 3.55	5 ~ 6.26	-0.72 ~ -0.49
	Qω.6AS-3	E1 E3 E4 BLUP	62.99	60.15 ~ 65.83	whaas115192 ~ whaas115221	2.85 ~ 4.39	5.53 ~ 7.2	-0.84 ~ -0.56
	Qω.7DS-1	E2 BLUP	44.09	42.20 ~ 45.97	whaas165320 ~ whaas165374	3.06 ~ 3.91	4.93 ~ 7.37	0.46 ~ 0.78
α	Qα.1AS-1	E2 BLUP	4.72	0.00 ~ 9.43	whaas291 ~ whaas430	2.69 ~ 2.71	4.59 ~ 5.89	-1.26 ~ -0.88
	Qα.1BL-1	E4	102.28	102.10 ~ 102.46	whaas14063 ~ whaas14076	2.52	4.13	-1.39
	Qα.1DS-1	E3 E4 BLUP	4.58	0.00 ~ 9.16	whaas14716 ~ whaas14882	2.5 ~ 5.88	4.01 ~ 11.2	-1.64 ~ -1.02
	Qα.4BS-1	E4	41.25	40.97 ~ 41.53	whaas83235 ~ whaas83226	3.33	4.82	-1.5
	Qα.4DS-1	E1	17.55	10.49 ~ 24.61	whaas87639 ~ whaas87707	3.41	4.98	1.32
	Qα.5AL-1	E1	104.05	103.32 ~ 104.78	whaas96052 ~ whaas96059	2.73	3.5	-1.1
	Qα.6AS-3	E1 BLUP	62.99	60.15 ~ 65.83	whaas115192 ~ whaas115221	3.29 ~ 4.11	5.5 ~ 5.83	-1.42 ~ -0.97
	Qα.6DS-1	E1 BLUP	26.38	25.09 ~ 27.67	whaas136338 ~ whaas136402	3.30 ~ 3.71	5.49 ~ 5.8	-1.38 ~ -1.00
	Qα.6D-2	E3 E4	45.43	40.74 ~ 50.11	whaas136878 ~ whaas137562	3.39 ~ 3.77	5.5 ~ 6.86	-1.61 ~ -1.28
	Qα.7DS-1	E1 E2 E3 E4 BLUP	44.09	42.20 ~ 45.97	whaas165320 ~ whaas165374	3.40 ~ 6.93	5.65 ~ 12.83	1.43 ~ 1.63
γ	Qγ.2BL-1	E1 BLUP	172.94	170.32 ~ 175.56	whaas38611 ~ whaas38834	2.72 ~ 3.02	2.3 ~ 2.41	0.47 ~ 0.6
	Qγ.3AS-1	E4	5.75	5.61 ~ 5.88	whaas42800 ~ whaas42804	2.59	5.51	-0.84
	Qγ.3DL-1	BLUP	92.77	92.48 ~ 93.05	whaas73763 ~ whaas73846	3.03	2.29	0.47
	Qγ.4AL-2	E1 E2 BLUP	101.71	101.17 ~ 102.25	whaas80354 ~ whaas80430	3.23 ~ 5.53	3.02 ~ 6.09	0.64 ~ 0.8
	Qγ.4BS-2	E1 BLUP	67.08	66.82 ~ 67.34	whaas84400 ~ whaas84089	4.42 ~ 5.05	3.93 ~ 4.33	-0.8 ~ -0.62
	Qγ.4BL-3	E2	142.07	141.25 ~ 142.89	whaas87423 ~ whaas87481	3.87	4.68	0.7
	Qγ.4DS-1	E1 BLUP	17.55	10.49 ~ 24.61	whaas87639 ~ whaas87707	5.5 ~ 5.69	4.68 ~ 5.6	0.67 ~ 0.91
	Qγ.6AS-1	BLUP	19.86	19.85 ~ 19.86	whaas114883 ~ whaas114884	2.95	1.97	-0.44
	Qγ.6AS-2	E1	47.71	42.01 ~ 53.40	whaas115058 ~ whaas115193	4.98	7.44	-1.05
	Qγ.6AS-3	BLUP	62.99	60.15 ~ 65.83	whaas115192 ~ whaas115221	6.01	5.07	-0.7
	Qγ.6AS-4	E2	77.57	77.10 ~ 78.03	whaas115395 ~ whaas115424	7.52	9.6	-1.01
	Qγ.6D-2	E2 E3 BLUP	45.43	40.74 ~ 50.11	whaas136878 ~ whaas137562	2.58 ~ 7.21	5.44 ~ 6.07	-0.76 ~ -0.67
	Qγ.7AS-1	E2	14.97	14.82 ~ 15.12	whaas138948 ~ whaas138968	3.63	6.54	0.83
	Qγ.7AS-2	E2	34.3	34.15 ~ 34.44	whaas139248 ~ whaas139252	4.54	6.3	-0.82
	Qγ.7AL-3	E4	165.97	165.55 ~ 166.38	whaas151228 ~ whaas151291	3.56	7.56	-0.99
	Qγ.7DS-1	E1 E2 BLUP	44.09	42.20 ~ 45.97	whaas165320 ~ whaas165374	7.83 ~ 8.41	6.73 ~ 10.12	0.81 ~ 1.19
	Qγ.7DL-2	E1	64.71	64.57 ~ 64.84	whaas166754 ~ whaas166770	5.12	5.5	-0.91
	Qγ.7DL-3	E2 BLUP	72.79	71.58 ~ 73.99	whaas166927 ~ whaas167040	4.07 ~ 4.91	3.18 ~ 5.59	-0.77 ~ -0.55

## Sheet: Table S4 QTL clusters
Table S4. Genetic positions and the associated markers of QTL clusters
Code	Cluster	Position (cM)	Flanking Markers	Trait
1	1AS-1	4.72	Whaas291 ~ Whaas430	Glia(E2)
				ω(E2)
				α(E2 BLUP)
2	1BL-1	102.28	Whaas14063 ~ Whaas14076	α(E4)
3	1DS-1	4.58	Whaas14716 ~ Whaas14882	Gli(BLUP)
				α(E3 E4 BLUP)
4	1DL-2	41.66	Whaas16172 ~ Whaas16200	Glia(BLUP)
5	1DL-3	103.59	Whaas16947 ~ Whaas16960	ω(E3 BLUP)
6	2AS-1	31.55	Whaas17922 ~ Whaas17921	ω(E1)
7	2BL-1	172.94	Whaas38611 ~ Whaas38834	γ(E1 BLUP)
8	2DL-1	65.47	Whaas41789 ~ Whaas41800	Glia(E4)
9	3AS-1	5.75	Whaas42800 ~ Whaas42804	γ(E4)
10	3DL-1	92.77	Whaas73763 ~ Whaas73846	Glia(E3)
				γ(BLUP)
11	4AL-1	67.64	Whaas79961 ~ Whaas79953	Glia(E1)
12	4AL-2	101.71	Whaas80354 ~ Whaas80430	Glia(E2 BLUP)
				ω(E2 BLUP)
				γ(E1 E2 BLUP)
13	4BS-1	41.25	Whaas83235 ~ Whaas83226	α(E4)
14	4BS-2	67.08	Whaas84400 ~ Whaas84089	γ(E1 BLUP)
15	4BL-3	142.07	Whaas87423 ~ Whaas87481	γ(E2)
16	4DS-1	17.55	Whaas87639 ~ Whaas87707	Glia(E1 BLUP)
				ω(E1 BLUP)
				α(E1)
				γ(E1 BLUP)
17	5AL-1	104.05	Whaas96052 ~ Whaas96059	α(E1)
18	5DL-1	29.63	Whaas113335 ~ Whaas113371	ω(E2 E3 BLUP)
19	6AS-1	19.86	Whaas114883 ~ Whaas114884	γ(BLUP）
20	6AS-2	47.71	Whaas115058 ~ Whaas115193	γ(E1)
21	6AS-3	62.99	Whaas115192 ~ Whaas115221	Glia(E1 BLUP)
				ω(E1 E3 E4 BLUP)
				α(E1 BLUP)
				γ(BLUP)
22	6AS-4	77.57	Whaas115395 ~ Whaas115424	Glia(E2)
				γ(E2)
23	6DS-1	26.38	Whaas136338 ~ Whaas136402	Glia(E1)
				α(E1 BLUP)
24	6D-2	45.43	Whaas136878 ~ Whaas137562	Glia(E2 E3 BLUP)
				α(E3 E4)
				γ(E2 E3 BLUP)
25	7AS-1	14.97	Whaas138948 ~ Whaas138968	γ(E2)
26	7AS-2	34.3	Whaas139248 ~ Whaas139252	Glia(E2)
				γ(E2)
27	7AL-3	165.97	Whaas151228 ~ Whaas151291	γ(E4)
28	7DS-1	44.09	Whaas165320 ~ Whaas165374	Glia(E1 E2 E4 BLUP)
				ω(E2 BLUP)
				α(E1 E2 E3 E4 BLUP)
				γ(E1 E2 BLUP)
29	7DL-2	64.71	Whaas166754 ~ Whaas166770	γ(E1)
30	7DL-3	72.79	Whaas166927 ~ Whaas167040	Glia(E4 BLUP)
				γ(E2 BLUP)

## Sheet: Table S5 E-QTL
Table S5 Epistatic QTL pairs for the gliadin contents (total and individual fractions) in the RIL population
Chromosome1	Position1	LeftMarker1	RightMarker1	Chromosome2	Position2	LeftMarker2	RightMarker2	TraitName
1	25	Marker1016	Marker989	5	150.006	Marker37803	Marker37820	E2Gli
1	50	Marker4473	Marker4106	5	150.006	Marker37803	Marker37820	E2Gli
2	50.002	Marker12723	Marker12627	16	50.032	Marker115058	Marker115193	E3Gli
2	50.002	Marker12723	Marker12627	16	150.032	Marker120631	Marker120491	E3Gli
2	75.002	Marker13426	Marker13693	16	50.032	Marker115058	Marker115193	E3Gli
3	75.003	Marker16813	Marker16856	8	0.021	Marker49385	Marker49329	E3Gli
3	100.003	Marker16958	Marker16947	21	100.047	Marker167486	Marker167498	E3Gli
6	75.007	Marker41949	Marker42117	9	25.022	Marker72814	Marker72835	E2Gli
7	50.02	Marker44824	Marker44712	14	50.03	Marker106671	Marker106913	E1Gli
7	75.02	Marker46983	Marker47049	15	50.031	Marker113871	Marker113887	E3Gli
9	25.022	Marker72814	Marker72835	12	25.025	Marker87707	Marker87689	E2Gli
10	150.023	Marker82495	Marker82507	14	50.03	Marker106671	Marker106913	E4Gli
11	100.024	Marker86272	Marker86121	19	175.04	Marker151571	Marker151846	E1Gli
11	100.024	Marker86272	Marker86121	19	100.04	Marker143583	Marker144977	E1Gli
11	125.024	Marker87010	Marker87152	13	25.026	Marker90084	Marker90069	E2Gli
13	0.026	Marker89439	Marker89436	16	75.032	Marker115339	Marker115407	E3Gli
13	0.026	Marker89439	Marker89436	16	100.032	Marker117743	Marker117844	E3Gli
15	25.031	Marker112650	Marker112815	21	100.047	Marker167486	Marker167498	E2Gli，E3Gli
16	175.032	Marker120723	Marker120806	19	150.04	Marker149198	Marker149122	E1Gli
18	0.037	Marker136003	Marker136011	19	75.04	Marker142567	Marker141930	E2Gli
1	0	Marker291	Marker290	7	100.02	Marker47861	Marker47882	E1ω
1	75	Marker5006	Marker5971	14	50.03	Marker106671	Marker106913	E1ω
1	100	Marker7128	Marker7071	5	50.006	Marker25801	Marker27156	E2ω
1	150	Marker8436	Marker8481	17	0.036	Marker121288	Marker121255	E1ω
2	100.002	Marker14034	Marker14050	5	25.006	Marker24896	Marker25172	E3ω
2	125.002	Marker14231	Marker14311	4	0.005	Marker17008	Marker17007	E1ω
2	150.002	Marker14547	Marker14628	15	125.031	Marker114482	Marker114510	E1ω
5	175.006	Marker38959	Marker38771	16	150.032	Marker120631	Marker120491	E1ω
6	50.007	Marker41116	Marker41447	12	50.025	Marker87799	Marker87769	E3ω
7	0.02	Marker42699	Marker42516	12	50.025	Marker87799	Marker87769	E1ω
7	50.02	Marker44824	Marker44712	20	25.046	Marker152842	Marker152846	E1ω
7	75.02	Marker46983	Marker47049	11	125.024	Marker87010	Marker87152	E3ω
7	125.02	Marker48516	Marker48485	10	150.023	Marker82495	Marker82507	E1ω
7	125.02	Marker48516	Marker48485	10	150.023	Marker82495	Marker82507	E2ω
8	0.021	Marker49385	Marker49329	10	150.023	Marker82495	Marker82507	E2ω
8	25.021	Marker50951	Marker51189	15	50.031	Marker113871	Marker113887	E3ω
8	50.021	Marker65246	Marker60441	15	50.031	Marker113871	Marker113887	E3ω
9	0.022	Marker71613	Marker71659	9	50.022	Marker73081	Marker73123	E2ω
9	0.022	Marker71613	Marker71659	21	50.047	Marker165416	Marker165424	E4ω
9	0.022	Marker71613	Marker71659	10	25.023	Marker74412	Marker74497	E4ω
9	50.022	Marker73081	Marker73123	15	25.031	Marker112650	Marker112815	E1ω
10	0.023	Marker73924	Marker73963	20	25.046	Marker152842	Marker152846	E3ω
10	25.023	Marker74412	Marker74497	13	175.026	Marker97549	Marker97748	E3ω
10	75.023	Marker79934	Marker80029	20	125.046	Marker162302	Marker162210	E3ω
10	150.023	Marker82495	Marker82507	17	0.036	Marker121288	Marker121255	E1ω，E2ω，E3ω
10	150.023	Marker82495	Marker82507	13	100.026	Marker95380	Marker95758	E2ω
10	150.023	Marker82495	Marker82507	20	25.046	Marker152842	Marker152846	E4ω
11	50.024	Marker83330	Marker83454	12	100.025	Marker89319	Marker89332	E3ω
12	50.025	Marker87799	Marker87769	20	125.046	Marker162302	Marker162210	E1ω
12	50.025	Marker87799	Marker87769	20	150.046	Marker163206	Marker163211	E1ω
13	0.026	Marker89439	Marker89436	18	100.037	Marker138023	Marker138098	E3ω
13	0.026	Marker89439	Marker89436	16	100.032	Marker117743	Marker117844	E3ω
14	0.03	Marker98532	Marker98536	19	125.04	Marker146836	Marker147080	E4ω
18	0.037	Marker136003	Marker136011	19	75.04	Marker142567	Marker141930	E2ω
1	25	Marker1016	Marker989	5	150.006	Marker37803	Marker37820	E2α
1	50	Marker4473	Marker4106	5	150.006	Marker37803	Marker37820	E2α
1	75	Marker5006	Marker5971	5	150.006	Marker37803	Marker37820	E2α
6	0.007	Marker40249	Marker40252	17	25.036	Marker121706	Marker121880	E2α
6	50.007	Marker41116	Marker41447	16	100.032	Marker117743	Marker117844	E3α
7	50.02	Marker44824	Marker44712	14	50.03	Marker106671	Marker106913	E1α
7	50.02	Marker44824	Marker44712	14	100.03	Marker109276	Marker109321	E2α
7	75.02	Marker46983	Marker47049	16	0.032	Marker114885	Marker114886	E4α
7	75.02	Marker46983	Marker47049	16	25.032	Marker114890	Marker114993	E4α
7	100.02	Marker47861	Marker47882	11	0.024	Marker82669	Marker82667	E3α
9	50.022	Marker73081	Marker73123	17	50.036	Marker124605	Marker124531	E2α
10	100.023	Marker80242	Marker80277	12	100.025	Marker89319	Marker89332	E1α
11	100.024	Marker86272	Marker86121	19	175.04	Marker151571	Marker151846	E1α
11	100.024	Marker86272	Marker86121	13	25.026	Marker90084	Marker90069	E2α
11	125.024	Marker87010	Marker87152	13	25.026	Marker90084	Marker90069	E1α，E2α
12	50.025	Marker87799	Marker87769	14	100.03	Marker109276	Marker109321	E4α
13	50.026	Marker92964	Marker93110	21	100.047	Marker167486	Marker167498	E1α
15	100.031	Marker114293	Marker114301	21	50.047	Marker165416	Marker165424	E3α
16	175.032	Marker120723	Marker120806	19	150.04	Marker149198	Marker149122	E1α
17	50.036	Marker124605	Marker124531	20	175.046	Marker163835	Marker164061	E2α
18	0.037	Marker136003	Marker136011	19	75.04	Marker142567	Marker141930	E2α
18	100.037	Marker138023	Marker138098	19	150.04	Marker149198	Marker149122	E4α
1	75	Marker5006	Marker5971	11	100.024	Marker86272	Marker86121	E1γ
2	50.002	Marker12723	Marker12627	8	0.021	Marker49385	Marker49329	E1γ
2	50.002	Marker12723	Marker12627	7	25.02	Marker43330	Marker43164	E2γ
2	100.002	Marker14034	Marker14050	20	175.046	Marker163835	Marker164061	E1γ
2	100.002	Marker14034	Marker14050	18	75.037	Marker137922	Marker137923	E1γ，E2γ，E3γ
2	125.002	Marker14231	Marker14311	15	100.031	Marker114293	Marker114301	E1γ
2	125.002	Marker14231	Marker14311	18	75.037	Marker137922	Marker137923	E3γ
3	0.003	Marker14716	Marker14750	13	0.026	Marker89439	Marker89436	E2γ
3	25.003	Marker15182	Marker15213	8	0.021	Marker49385	Marker49329	E1γ
4	25.005	Marker17698	Marker17725	10	150.023	Marker82495	Marker82507	E2γ
5	50.006	Marker25801	Marker27156	16	150.032	Marker120631	Marker120491	E2γ
5	75.006	Marker29474	Marker30188	16	150.032	Marker120631	Marker120491	E2γ
5	100.006	Marker32317	Marker33871	16	175.032	Marker120723	Marker120806	E3γ
6	25.007	Marker40438	Marker40581	20	100.046	Marker160024	Marker159863	E1γ
7	50.02	Marker44824	Marker44712	19	100.04	Marker143583	Marker144977	E1γ
7	75.02	Marker46983	Marker47049	19	100.04	Marker143583	Marker144977	E1γ
7	75.02	Marker46983	Marker47049	18	125.037	Marker138226	Marker138229	E4γ
8	75.021	Marker65324	Marker65982	18	0.037	Marker136003	Marker136011	E1γ
10	50.023	Marker79132	Marker79653	19	150.04	Marker149198	Marker149122	E1γ
10	150.023	Marker82495	Marker82507	14	50.03	Marker106671	Marker106913	E4γ
11	150.024	Marker87495	Marker87610	17	50.036	Marker124605	Marker124531	E1γ
14	100.03	Marker109276	Marker109321	15	25.031	Marker112650	Marker112815	E3γ
14	150.03	Marker111897	Marker111944	19	0.04	Marker138299	Marker138344	E3γ
14	150.03	Marker111897	Marker111944	18	50.037	Marker137565	Marker137562	E4γ
15	25.031	Marker112650	Marker112815	21	100.047	Marker167486	Marker167498	E2γ，E3γ

## Sheet: Table S6 KASP sequence
Table S6 KASP primers sequence used in the present study
Primer Code	KASP primer sequence (5'-3')
AX-108761918F1	GAAGGTGACCAAGTTCATGCTCCGGAGTGTGGCTCATTGTGAAATT
AX-108761918F2	GAAGGTCGGAGTCAACGGATTCCGGAGTGTGGCTCATTGTGAAATG
AX-108761918R	GTAGTACTTGCCTAACCACACCTCTA
AX-109331772F1	GAAGGTGACCAAGTTCATGCTCACCGCGCACTGTATGTATACACAC
AX-109331772F2	GAAGGTCGGAGTCAACGGATTCACCGCGCACTGTATGTATACACAT
AX-109331772R	GGAGATACATATATACGAACATGCGATGGC
AX-108913293F1	GAAGGTGACCAAGTTCATGCTCTCAGGGACATTCTCAGTCAGATCCA
AX-108913293F2	GAAGGTCGGAGTCAACGGATTCTCAGGGACATTCTCAGTCAGATCCG
AX-108913293R	AATATTGCCAATAACGCCCAAACTGGTGCT

## Sheet: Tabel S7 KASP Pryamiding
Table S7 Additive effect analysis of three KASP markers for gliadins content and fractions in the RIL population
Marker	Parents	Genotype	No. of Individuals	Content of various traits (106AU/mg)
				Gli	ω	α	γ
AX-108761918	Luozhen No.1	G	145	61.25	11.53	30.86	18.86
	Zhengyumai9987	T	37	58.47*	10.69*	29.97ns	17.82*
AX-109331772	Luozhen No.1	C	96	62.46	11.7	31.52	19.24
	Zhengyumai9987	T	99	58.80**	10.98*	29.75**	18.07**
AX-108913293	Zhengyumai9987	A	81	62.95	11.76	31.88	19.31
	Luozhen No.1	G	104	58.71***	10.93*	29.60***	18.18**
Superior alleles recombinants		G+C+A	26	67.43	12.7	33.88	20.86
Inferior alleles recombinants		T+T+G	7	55.32***	10.20**	28.43**	16.69***
Increase or decrease ratio of two allele combinations (±%)（±%）				21.89	24.51	19.17	24.99
a, b, c and d represent different significance levels based on analysis of variance at P < 0.05.

## Sheet: Table S8 w gliadin in natural
Table S8 Additive effect analysis of AX-108913293 for the ω- gliadin content in a set of world-wide collected wheat varieties collected worldwide
SNP Type	No. of varieties	ω- gliadin content
		E5	E6	E7
A	112	6.63	5.81	9.71
G	90	5.03	4.57	7.04
P value		0.00376	0.00254	5.11e-05
%		31.82	27.15	38
E5, E6 and E7 represent the 2017Yuanyang, 2018Yuanyang and 2018Shangqiu respectively.
*** and ** indicate significant levels of P<0.001 and P<0.01, respectively.

## Sheet: Table S9 differential express
Table S9 Differentially expressed genes in three major QTL during various grain developmental stages
Gene ID	Function description	FPKM						Developmental stage
		Luozhen No1-1	Luozhen No1-2	Luozhen No1-3	Zhengyumai9987-1	Zhengyumai9987-2	Zhengyumai9987-3
TraesCS4D01G010500	Signal peptide peptidase-like protein	1.76134	0.811091	0.875704	0	0.138447	0.463884	5 DAP
TraesCS4D01G030000	DUF538 family protein, putative (Protein of unknown function, DUF538)	26.9255	23.2671	25.6562	4.80181	5.76209	5.03611	5 DAP
TraesCS4D01G018000	Acidic leucine-rich nuclear phosphoprotein 32-related protein	9.01421	9.05813	11.8505	3.51634	4.20232	2.77698	5 DAP
TraesCS4D01G050700	UV-B-induced protein, chloroplastic	4.22643	4.55383	5.14067	2.74282	1.80191	2.10553	5 DAP
TraesCS4D01G030500	Protein DETOXIFICATION	0	0	0	5.61232	2.79506	4.89566	5 DAP
TraesCS4D01G054000	GRAS transcription factor	2.00512	1.65036	2.01183	3.94629	3.78599	5.08443	5 DAP
TraesCS4D01G017000	Pleckstrin-like (PH) domain protein	5.34432	5.19126	5.84666	12.0602	13.1569	15.11	5 DAP
TraesCS4D01G051900	Alpha/beta-Hydrolases superfamily protein	9.05765	7.87047	9.25816	23.777	18.4756	20.2953	5 DAP
TraesCS4D01G032500	Germin-like protein 1-1	3.06764	8.78249	5.11452	2.96164	1.5008	0.813694	5 DAP
TraesCS4D01G021400	Phosphomethylpyrimidine synthase	20.6769	20.791	18.819	10.7044	8.23952	8.9162	5 DAP
TraesCS4D01G026700	5'-AMP-activated protein kinase subunit beta-1	1.77463	1.1583	1.69453	6.08489	8.36808	7.27627	5 DAP
TraesCS4D01G049200	RNA-binding protein 34	8.8902	7.51793	6.64462	16.4199	19.0489	19.0545	5 DAP
TraesCS4D01G026300	GMP synthase [glutamine-hydrolyzing]	30.3921	25.205	27.0911	15.0947	13.4139	14.9573	5 DAP
TraesCS4D01G030400	Protein DETOXIFICATION	0	0	0	15.6684	18.9669	14.5298	5 DAP
TraesCS4D01G017900	Deoxyuridine 5'-triphosphate nucleotidohydrolase	44.9582	39.6503	38.6118	21.3375	20.2878	22.4093	5 DAP
TraesCS4D01G039200	Plastid-lipid associated protein PAP / fibrillin family protein	2.27325	2.04629	2.04227	0.812738	1.28407	0.994444	5 DAP
TraesCS4D01G009200	Monodehydroascorbate reductase	74.4281	61.9961	61.7358	34.3906	31.2124	36.5831	5 DAP
TraesCS4D01G061600	Peptide-N4-(N-acetyl-beta-glucosaminyl)asparagine amidase A	1.74959	1.68972	1.41167	0.416934	1.10992	0.691914	5 DAP
TraesCS4D01G051100	Alpha/beta-Hydrolases superfamily protein	15.5041	10.9947	14.9267	7.6064	6.8701	7.60067	5 DAP
TraesCS4D01G001900	Calcium-dependent lipid-binding domain protein	3.61789	2.81899	3.51606	1.76149	1.52145	1.54312	5 DAP
TraesCS4D01G059800	FBD-associated F-box protein	0.609837	0.476495	1.48653	0.105918	0.312922	0.36668	5 DAP
TraesCS4D01G053100	Histone H2A	20.3112	11.0294	7.29342	103.592	84.0336	82.6831	10 DAP
TraesCS4D01G030000	DUF538 family protein, putative (Protein of unknown function, DUF538)	164.145	191.313	86.8134	38.623	71.498	61.7455	10 DAP
TraesCS4D01G018000	Acidic leucine-rich nuclear phosphoprotein 32-related protein	8.25437	9.29852	7.94911	0.151621	0.338183	0.417788	10 DAP
TraesCS4D01G050700	UV-B-induced protein, chloroplastic	5.42823	6.60544	8.30851	2.36584	2.49884	3.00963	10 DAP
TraesCS4D01G030500	Protein DETOXIFICATION	0.036802	0	0.024432	3.6357	8.48921	1.94445	10 DAP
TraesCS4D01G009800	Histidine-containing phosphotransfer protein	0.046962	0	0.063696	3.41383	1.20625	1.92887	10 DAP
TraesCS4D01G035500	Pentatricopeptide repeat-containing protein	0.279312	0.376731	0.140679	1.12674	0.502084	1.1013	10 DAP
TraesCS4D01G024400	Peptide transporter	1.47521	2.01746	1.84269	0	0.033636	0.107078	10 DAP
TraesCS4D01G024900	GDSL esterase/lipase	8.50546	11.8078	22.361	0.306773	2.81483	1.97744	10 DAP
TraesCS4D01G004100	NBS-LRR-like resistance protein	0.294405	0.293306	0.183645	0.681015	0.599337	0.534747	10 DAP
TraesCS4D01G059900	ACT domain containing protein, expressed	0.259791	0.221736	0.111448	7.76785	1.91777	2.59295	10 DAP
TraesCS4D01G058800	ATP dependent RNA helicase	2.14272	2.2239	2.55702	6.61878	4.63567	3.92548	10 DAP
TraesCS4D01G059800	FBD-associated F-box protein	0.498372	0.699602	0.904382	0	0	0	10 DAP
TraesCS4D01G066000	Cysteine proteinase inhibitor	9.7732	7.58938	2.6558	80.3512	37.3477	35.5945	10 DAP
TraesCS4D01G048600	Sec-independent protein translocase protein TatA	2.24075	2.76041	2.17187	13.5614	11.8377	12.084	10 DAP
TraesCS4D01G057300	myb-like protein X	16.5185	15.1777	18.6124	7.63329	7.33551	7.37111	10 DAP
TraesCS4D01G023500	Beta-xylosidase, putative	4.13333	7.77446	4.44749	59.9754	23.6122	38.5686	10 DAP
TraesCS4D01G035000	Laccase	2.49866	2.42001	1.21195	12.365	8.85709	11.2969	10 DAP
TraesCS4D01G001900	Calcium-dependent lipid-binding domain protein	2.82629	3.87878	3.50576	17.7131	6.22267	7.99568	10 DAP
TraesCS4D01G032500	Germin-like protein 1-1	24.2527	33.3572	28.1715	3.69222	6.45049	3.18369	10 DAP
TraesCS4D01G011500	Carboxypeptidase	0.656385	0.459664	0.169927	0.925601	2.54294	1.87666	10 DAP
TraesCS4D01G029200	Nuclease domain-containing protein 1	22.1563	20.6218	17.744	60.0253	29.6565	36.5773	10 DAP
TraesCS4D01G022400	Tetratricopeptide repeat protein 1-like	4.14987	3.49206	4.18619	1.1968	2.3239	1.21139	10 DAP
TraesCS4D01G062900	GRF1-interacting factor-like protein	6.78341	7.6019	7.24159	1.61561	2.2444	2.84975	10 DAP
TraesCS4D01G017000	Pleckstrin-like (PH) domain protein	5.26462	4.15349	6.1878	13.1229	16.0974	15.8038	10 DAP
TraesCS4D01G017900	Deoxyuridine 5'-triphosphate nucleotidohydrolase	15.2258	21.3396	23.9352	7.03967	6.38577	3.91821	10 DAP
TraesCS4D01G020900	Glycine-rich protein	43.6442	38.4266	28.5627	11.3489	18.5653	17.3381	10 DAP
TraesCS4D01G063000	Endoplasmic reticulum oxidoreductin-1	10.3372	7.79621	9.89322	31.2694	15.0841	17.2984	10 DAP
TraesCS4D01G051600	Transcription factor Inducer of CBF expression 1	0.882757	1.29667	0.699432	1.69045	5.22636	6.62552	10 DAP
TraesCS4D01G026300	GMP synthase [glutamine-hydrolyzing]	21.9434	19.3997	14.6278	43.3405	36.8606	37.2558	10 DAP
TraesCS4D01G009600	Histidine-containing phosphotransfer protein	0	0	0	13.7461	1.52305	2.77628	10 DAP
TraesCS4D01G030400	Protein DETOXIFICATION	0.023719	0	0.084611	24.1191	23.8169	24.5246	10 DAP
TraesCS4D01G034600	Pescadillo homolog	14.5572	12.765	11.5671	42.1737	19.7886	23.1825	10 DAP
TraesCS4D01G061400	Cathepsin B-like cysteine protease	32.052	18.1345	18.7122	44.3055	86.0143	61.0178	15 DAP
TraesCS4D01G029700	Protein UPSTREAM OF FLC	1.58656	1.81595	1.42116	4.38122	3.508	4.44567	15 DAP
TraesCS4D01G017000	Pleckstrin-like (PH) domain protein	4.75449	3.50431	4.98074	9.75648	11.2261	11.2148	15 DAP
TraesCS4D01G024400	Peptide transporter	1.44582	1.27849	1.8224	0.046098	0.027433	0	15 DAP
TraesCS4D01G035200	Lipoxygenase	62.2597	38.5549	69.9166	9.10269	20.8141	17.1602	15 DAP
TraesCS4D01G015800	Thaumatin like protein	0.84893	1.17063	0.292084	3.07035	4.35383	4.9494	15 DAP
TraesCS4D01G060400	Serine carboxypeptidase family protein, expressed	3.21764	1.82869	5.08847	0.66316	1.74436	0.702352	15 DAP
TraesCS4D01G018000	Acidic leucine-rich nuclear phosphoprotein 32-related protein	9.48782	4.23273	9.57161	0.451461	0.16965	0.565006	15 DAP
TraesCS4D01G020900	Glycine-rich protein	23.0144	12.0091	38.2783	8.61654	9.96622	10.0177	15 DAP
TraesCS4D01G047400	Glutamine synthetase	13.0894	7.98466	10.4134	3.39534	4.90134	4.26531	15 DAP
TraesCS4D01G015400	Tubulin beta chain	10.1572	3.07108	14.4817	2.00112	2.80398	3.06682	15 DAP
TraesCS4D01G052500	Glutamate decarboxylase	10.378	7.13393	22.3935	4.45839	5.56962	5.5916	15 DAP
TraesCS4D01G020300	Growth-regulating factor	0.440998	0.296757	0.649285	1.36867	2.59467	1.04805	15 DAP
TraesCS4D01G048600	Sec-independent protein translocase protein TatA	4.26468	1.19931	1.9187	4.0862	9.48865	10.877	15 DAP
TraesCS4D01G057300	myb-like protein X	10.7642	8.81598	10.8932	4.8405	5.19959	5.06707	15 DAP
TraesCS4D01G030000	DUF538 family protein, putative (Protein of unknown function, DUF538)	19.3215	99.9223	25.4061	7.07803	8.12844	6.21291	20 DAP
TraesCS4D01G025600	Cysteine proteinase inhibitor	13.497	20.4453	22.5883	23.6733	64.7045	58.7988	20 DAP
TraesCS4D01G018000	Acidic leucine-rich nuclear phosphoprotein 32-related protein	3.56096	3.28872	3.91111	0.170171	0.224636	0.112434	20 DAP
TraesCS4D01G013500	Non specific phospholipase C	2.33797	1.32155	1.86465	6.55503	3.43515	3.71004	20 DAP
TraesCS4D01G005600	2-oxoglutarate (2OG) and Fe(II)-dependent oxygenase superfamily protein	0.497873	1.07757	0.81286	0.116267	0.203179	0.211835	20 DAP
TraesCS4D01G017000	Pleckstrin-like (PH) domain protein	3.11811	4.04706	2.416	11.2224	11.0648	11.0009	20 DAP
TraesCS4D01G024400	Peptide transporter	0.516657	0.826587	0.687657	0.053025	0	0	20 DAP
TraesCS4D01G015400	Tubulin beta chain	1.26187	1.52611	1.66415	0.57769	0.346172	0.31934	20 DAP
TraesCS4D01G026700	5'-AMP-activated protein kinase subunit beta-1	1.83518	1.66305	1.54179	5.55899	5.29019	6.10838	20 DAP
TraesCS4D01G005700	Cytochrome P450 family protein, expressed	3.00093	3.49093	4.23351	0.923412	0.512337	0.34712	20 DAP
TraesCS4D01G035000	Laccase	12.9069	26.3882	23.2338	4.30874	6.35627	5.05661	20 DAP
TraesCS4D01G012100	Short-chain dehydrogenase/reductase family protein	1.10825	1.12299	1.17392	2.57629	2.53528	2.8897	20 DAP
TraesCS4D01G015800	Thaumatin like protein	2.97335	2.04768	2.13784	5.52634	8.07799	3.13574	20 DAP
TraesCS4D01G050400	Histidine kinase	1.06072	1.46469	1.0449	0.636616	0.330792	0.469503	20 DAP
TraesCS4D01G049200	RNA-binding protein 34	1.69743	2.41996	1.60284	4.47805	3.24005	4.05604	20 DAP
TraesCS4D01G030400	Protein DETOXIFICATION	4.61269	7.61787	5.52644	28.6668	32.1451	21.5334	20 DAP
TraesCS4D01G057300	myb-like protein X	9.07037	7.87899	7.20745	3.87281	1.80408	2.63657	20 DAP
TraesCS4D01G030000	DUF538 family protein, putative (Protein of unknown function, DUF538)	8.51836	15.1176	14.684	3.122	2.86558	2.47565	25 DAP
TraesCS4D01G018000	Acidic leucine-rich nuclear phosphoprotein 32-related protein	3.76988	3.02778	3.85874	0	0.113159	0.188548	25 DAP
TraesCS4D01G046200	CONSTANS-like zinc finger protein	1.58363	1.02562	2.53805	0.240087	0.659298	0.62067	25 DAP
TraesCS4D01G006000	NBS-LRR disease resistance protein-like protein	0.212989	0.271795	0.301037	0.38537	0.633509	0.644554	25 DAP
TraesCS4D01G001400	Sn1-specific diacylglycerol lipase alpha	0.671791	0.455703	0.399389	0.929423	1.01444	1.26196	25 DAP
TraesCS4D01G026800	NRT1/PTR family protein 2.2	30.2636	29.3621	32.0393	11.3138	12.5258	11.7317	25 DAP
TraesCS4D01G015400	Tubulin beta chain	0.664452	0.84026	1.04654	0.073942	0.141528	0.124124	25 DAP
TraesCS4D01G026700	5'-AMP-activated protein kinase subunit beta-1	1.15505	1.77953	2.28302	4.47792	5.47691	5.15094	25 DAP
TraesCS4D01G005700	Cytochrome P450 family protein, expressed	2.20444	3.11746	2.48038	0.696953	0.959733	0.837283	25 DAP
TraesCS4D01G006700	F1F0-ATPase inhibitor protein	124.708	98.2564	120.994	42.282	43.5901	40.8803	25 DAP
TraesCS4D01G035000	Laccase	13.6452	8.55723	12.3275	3.59056	3.46747	4.29992	25 DAP
TraesCS4D01G011200	C2 calcium/lipid-binding and GRAM domain protein	0.195262	0.755798	0.241315	0.896529	1.21811	1.18823	25 DAP
TraesCS4D01G005600	2-oxoglutarate (2OG) and Fe(II)-dependent oxygenase superfamily protein	0.416534	0.24597	0.445599	0.07215	0.034611	0.113186	25 DAP
TraesCS4D01G017000	Pleckstrin-like (PH) domain protein	3.45625	3.26656	3.11638	6.7855	9.79915	9.84335	25 DAP
TraesCS4D01G024400	Peptide transporter	0.788192	0.488344	0.775731	0	0.075742	0	25 DAP
TraesCS4D01G054600	BTB/POZ domain-containing protein	1.28584	0.904377	1.84398	2.4393	2.55029	2.75696	25 DAP
TraesCS4D01G020300	Growth-regulating factor	0.330183	0.997383	0.639015	1.46086	1.63115	1.5874	25 DAP
TraesCS4D01G015800	Thaumatin like protein	1.37406	1.1834	1.05766	8.55472	8.72243	7.4129	25 DAP
TraesCS4D01G008600	Histidine-containing phosphotransfer protein	88.2174	72.0786	58.8369	26.1783	25.2719	22.5421	25 DAP
TraesCS4D01G064000	Mitochondrial carrier protein, expressed	0.51977	0.363059	1.02604	1.41167	1.42541	1.8076	25 DAP
TraesCS4D01G009400	Histidine-containing phosphotransfer protein	8.29999	4.21026	6.58982	0.973288	0.855933	1.04326	25 DAP
TraesCS4D01G068700	Calcineurin B-like protein	1.91309	4.10401	2.32453	5.61916	4.77902	5.87663	25 DAP
TraesCS4D01G009300	Histidine-containing phosphotransfer protein	10.0895	6.25339	9.60097	3.20233	3.56784	2.45184	25 DAP
TraesCS4D01G012100	Short-chain dehydrogenase/reductase family protein	1.17619	2.58012	1.19165	2.9676	3.76721	3.32097	25 DAP
TraesCS4D01G020900	Glycine-rich protein	14.7867	9.64383	16.4324	2.33501	2.52055	2.80096	25 DAP
TraesCS4D01G030400	Protein DETOXIFICATION	2.94362	3.87722	7.55746	26.8496	24.5032	22.9187	25 DAP
TraesCS4D01G054100	late embryogenesis abundant protein	2.52354	7.64338	3.87515	15.7747	16.1003	16.3772	25 DAP
TraesCS4D01G057300	myb-like protein X	8.34015	10.0833	9.36114	2.25617	2.5615	2.37262	25 DAP
TraesCS4D01G008500	GDSL esterase/lipase	1.76213	3.99568	3.70917	0.939419	1.30143	0.686117	25 DAP
TraesCS4D01G048300	Hexosyltransferase	0.15642	0.293323	0.401882	2.32484	2.95952	2.72518	30 DAP
TraesCS4D01G025600	Cysteine proteinase inhibitor	18.4366	8.30027	26.2832	6.26112	5.3071	8.01175	30 DAP
TraesCS4D01G018000	Acidic leucine-rich nuclear phosphoprotein 32-related protein	1.63436	3.87844	2.81891	0.154733	0.214686	0	30 DAP
TraesCS4D01G013500	Non specific phospholipase C	4.68838	2.0529	3.12068	0.476119	0.887823	0.713458	30 DAP
TraesCS4D01G006200	Haloacid dehalogenase-like hydrolase superfamily protein	2.31532	3.95439	2.47883	1.58924	1.21023	1.45804	30 DAP
TraesCS4D01G029700	Protein UPSTREAM OF FLC	0.118858	0.269725	0.090703	1.14437	1.16237	1.03059	30 DAP
TraesCS4D01G022400	Tetratricopeptide repeat protein 1-like	2.65836	1.88345	2.50697	1.06619	1.02151	1.34861	30 DAP
TraesCS4D01G017000	Pleckstrin-like (PH) domain protein	2.99471	2.2039	2.20661	5.19243	6.5552	7.50228	30 DAP
TraesCS4D01G021400	Phosphomethylpyrimidine synthase	1.22052	2.09757	2.06041	10.6578	10.6433	12.2902	30 DAP
TraesCS4D01G026700	5'-AMP-activated protein kinase subunit beta-1	2.82394	2.70906	2.80424	6.5005	6.95081	8.56291	30 DAP
TraesCS4D01G031100	PsbP-like protein 1	0.632341	0.63233	1.17756	3.49332	2.68264	2.796	30 DAP
TraesCS4D01G065700	Methyltransferase	0.318398	0.609796	0.340207	2.17523	1.54461	1.56288	30 DAP
TraesCS4D01G006700	F1F0-ATPase inhibitor protein	66.9995	71.0769	71.7049	32.2078	30.8789	36.3827	30 DAP
TraesCS4D01G016000	Globulin-1	9026.03	8238.8	8391.77	3972.44	3912.83	4048.05	30 DAP
TraesCS4D01G008700	Histidine-containing phosphotransfer protein	0.344258	0.450374	0.041094	2.45283	5.91435	4.20342	30 DAP
TraesCS4D01G008600	Histidine-containing phosphotransfer protein	1.25876	2.39976	3.07334	9.49746	9.09962	8.58056	30 DAP
TraesCS4D01G027000	ESX-5 secretion system ATPase EccB5	0.588556	2.5789	2.62853	5.24376	7.59124	6.58887	30 DAP
TraesCS4D01G016100	Globulin-1	7924.44	7471.33	7447.55	3235.54	3209.51	3268.38	30 DAP
TraesCS4D01G054600	BTB/POZ domain-containing protein	5.84872	3.03854	4.66468	1.73877	2.10687	2.26366	30 DAP
TraesCS4D01G062800	Pollen Ole e 1 allergen/extensin	1.86799	3.49548	3.63533	1.6429	1.40481	2.13406	30 DAP
TraesCS4D01G026300	GMP synthase [glutamine-hydrolyzing]	23.6631	29.6715	26.1612	19.1514	17.7534	13.633	30 DAP
TraesCS4D01G068700	Calcineurin B-like protein	47.9459	50.7044	55.838	21.7439	21.717	25.955	30 DAP
TraesCS4D01G047400	Glutamine synthetase	58.0217	90.8354	66.9406	9.85586	10.0053	10.2456	30 DAP
TraesCS4D01G030400	Protein DETOXIFICATION	7.64691	4.46581	8.44111	48.903	46.7729	52.3607	30 DAP
TraesCS4D01G004000	Disease resistance protein (NBS-LRR class) family	0.016864	0.049545	0	0.4712	0.746317	0.675277	30 DAP
TraesCS4D01G002700	Short-chain dehydrogenase/reductase family protein	0.117446	0.373634	0.15796	1.08536	1.05892	1.09572	30 DAP
TraesCS4D01G002000	Mesoderm induction early response protein 1, putative isoform 1	16.9623	13.3607	17.7789	7.73745	9.29854	8.4843	30 DAP
TraesCS4D01G063400	SNF2 domain-containing protein / helicase domain-containing protein / zinc finger protein-like protein	39.8508	49.5339	37.3597	16.8958	19.3863	23.5408	30 DAP
TraesCS4D01G035700	Haloacid dehalogenase-like hydrolase	10.2437	10.245	10.9704	5.45881	5.64878	6.49658	30 DAP
TraesCS4D01G057300	myb-like protein X	5.60884	7.8278	6.90765	2.62076	2.30971	2.75966	30 DAP
TraesCS6A01G061500	Histone H3	16.1129	19.2134	14.3403	9.03635	8.45364	5.1573	5 DAP
TraesCS6A01G062700	Potassium transporter	3.32649	2.06235	2.47249	1.40015	0.831492	1.1075	5 DAP
TraesCS6A01G073500	F-box family protein	3.42669	2.90575	2.93058	1.19637	1.39824	0.66642	5 DAP
TraesCS6A01G059100	Syntaxin, putative	8.64706	10.2272	10.1627	4.17677	3.44999	3.8718	5 DAP
TraesCS6A01G062300	DNA-directed RNA polymerase II subunit rpb4	0.582195	0.621316	0.721673	2.01997	3.81508	3.18386	5 DAP
TraesCS6A01G063400	Histone H3	15.4272	11.6114	14.136	32.5883	39.1435	42.4515	5 DAP
TraesCS6A01G058700	LURP-one-like protein	6.23026	8.12216	8.17225	3.93319	3.78844	4.02724	5 DAP
TraesCS6A01G060700	Beta-fructofuranosidase, insoluble protein	13.9231	13.7075	11.3567	5.52094	5.16911	6.13892	5 DAP
TraesCS6A01G061300	Histone H4	38.6335	44.4417	31.7583	12.4446	17.0781	13.9121	10 DAP
TraesCS6A01G061500	Histone H3	15.6132	16.5324	19.9348	3.98701	4.23346	5.88993	10 DAP
TraesCS6A01G071900	Protein kinase, putative	0.187539	0.457105	0.14416	1.51932	0.654136	1.24721	10 DAP
TraesCS6A01G062500	F-box family protein	1.68384	1.18409	1.15715	0.250646	0.109315	0.405927	10 DAP
TraesCS6A01G055400	Histone H4	5.58148	5.4318	4.29185	1.50079	2.32848	2.36173	10 DAP
TraesCS6A01G060800	Beta-fructofuranosidase, insoluble protein	1.70415	2.02296	0.826841	0	0	0	10 DAP
TraesCS6A01G062300	DNA-directed RNA polymerase II subunit rpb4	1.26678	0.313988	0.071925	3.40634	5.02624	5.07165	10 DAP
TraesCS6A01G063400	Histone H3	15.2388	18.7974	13.9165	36.2276	42.7127	41.3203	10 DAP
TraesCS6A01G072000	Homeobox protein, putative	0	0.096171	0	5.34551	5.15838	8.26183	10 DAP
TraesCS6A01G073300	3-ketoacyl-CoA synthase	2.74998	1.93349	2.3939	0.666607	0.991804	1.03698	15 DAP
TraesCS6A01G065800	Histone-lysine N-methyltransferase	0.4842	0.254005	0.439461	0.896363	1.53828	1.40587	15 DAP
TraesCS6A01G062500	F-box family protein	1.09516	0.850742	0.983812	0.266319	0.516543	0.345934	15 DAP
TraesCS6A01G061000	F-box domain containing protein, expressed	6.10398	2.70244	7.0342	2.13588	2.14334	2.16179	15 DAP
TraesCS6A01G060800	Beta-fructofuranosidase, insoluble protein	1.51987	2.47749	1.65245	0.065758	0	0	15 DAP
TraesCS6A01G063400	Histone H3	9.42693	10.4156	9.32394	33.4863	37.4087	35.1002	15 DAP
TraesCS6A01G068500	C2 calcium/lipid-binding plant phosphoribosyltransferase family protein	0.751629	0.723156	0.468439	1.89077	1.62	2.23639	15 DAP
TraesCS6A01G060800	Beta-fructofuranosidase, insoluble protein	1.33616	2.04597	1.80631	0	0	0.037161	20 DAP
TraesCS6A01G073300	3-ketoacyl-CoA synthase	7.28473	5.89732	8.83756	2.98527	3.19958	2.85364	25 DAP
TraesCS6A01G060800	Beta-fructofuranosidase, insoluble protein	2.25871	2.45447	2.52592	0	0.038673	0	25 DAP
TraesCS6A01G063400	Histone H3	1.43875	3.02456	2.92116	7.14732	7.05391	8.83879	25 DAP
TraesCS6A01G061000	F-box domain containing protein, expressed	0.494113	0.693506	0.44705	1.97527	2.39496	1.58658	30 DAP
TraesCS6A01G059800	Dehydrin	41.4506	22.4263	33.5294	10.9798	11.1023	12.846	30 DAP
TraesCS7D01G082800	Polygalacturonase-1 non-catalytic beta subunit	7.39571	8.49675	13.2111	5.05072	4.31938	2.97411	5 DAP
TraesCS7D01G105500	Proteasome subunit beta type	59.6351	63.7956	59.2662	25.698	26.7989	23.8117	5 DAP
TraesCS7D01G124000	histone deacetylase 2	1.48526	1.25991	1.61728	4.7749	5.76159	2.9271	5 DAP
TraesCS7D01G131500	Stomatal closure-related actin-binding protein 1	0.116611	0.089946	0	2.07298	2.99013	2.0618	5 DAP
TraesCS7D01G088200	Early nodulin 93	15.0776	7.7555	9.03442	5.85726	2.89344	5.23577	5 DAP
TraesCS7D01G088000	Early nodulin 93	44.6322	21.989	33.6514	15.5517	14.3901	20.2321	5 DAP
TraesCS7D01G130800	Protein DETOXIFICATION	2.07043	2.44376	2.01317	0.61426	0.534778	0.684703	5 DAP
TraesCS7D01G089800	Anthocyanin 5-aromatic acyltransferase	0.878004	1.11674	0.881026	0.16737	0.207926	0.21593	5 DAP
TraesCS7D01G087800	Early nodulin 93	20.3011	10.0604	16.6075	4.57834	4.3201	7.81527	5 DAP
TraesCS7D01G087700	Early nodulin 93	20.2462	12.2309	13.2746	5.85611	3.72365	9.22844	5 DAP
TraesCS7D01G133500	Alkaline alpha-galactosidase seed imbibition protein	2.8273	1.83432	2.80881	0.471472	0.720307	0.689528	5 DAP
TraesCS7D01G108900	GDSL esterase/lipase	23.0152	20.9057	17.9682	11.7172	10.1487	10.5033	5 DAP
TraesCS7D01G131600	Glutathione S-transferase	0	0	0	5.34239	4.45129	4.98181	5 DAP
TraesCS7D01G107900	Acyl transferase	0.899846	0.748837	1.0986	0.148212	0.222113	0.38291	5 DAP
TraesCS7D01G086500	Gamma-aminobutyric acid receptor subunit gamma-2	7.26711	6.00306	2.53406	37.7181	42.1328	9.99741	10 DAP
TraesCS7D01G093500	F-box family protein	2.12604	1.53853	2.42764	0.845304	1.02586	0.799012	10 DAP
TraesCS7D01G088800	Early nodulin 93	3.17206	2.98698	3.34095	12.6719	7.29388	5.68456	10 DAP
TraesCS7D01G117100	Histone H3	0.978327	0.501111	0.904208	2.94142	4.15324	3.44577	10 DAP
TraesCS7D01G088300	Early nodulin 93	4.45332	4.99744	4.09274	11.9024	10.7438	8.02655	10 DAP
TraesCS7D01G131500	Stomatal closure-related actin-binding protein 1	0	0	0.055359	2.52634	3.0779	3.74417	10 DAP
TraesCS7D01G120900	Sulfite exporter TauE/SafE family protein	6.86282	7.64602	9.21678	1.82531	5.04477	3.86707	10 DAP
TraesCS7D01G127400	Histone-lysine N-methyltransferase	0.052033	0.018415	0.130555	0.943145	0.325517	0.525592	10 DAP
TraesCS7D01G097300	Xyloglucan endotransglucosylase/hydrolase	0.496387	0.163245	0.713589	4.69757	2.39899	3.40992	10 DAP
TraesCS7D01G120800	Serine carboxypeptidase family protein, expressed	0.948849	1.03422	1.54605	0.050745	0.178211	0.395694	10 DAP
TraesCS7D01G095700	Cytochrome P450 family protein	2.29337	2.62935	3.98762	0.228266	0.865771	0.317566	10 DAP
TraesCS7D01G083600	Eukaryotic aspartyl protease family protein	1.8139	1.51082	0.40465	26.1262	25.7865	22.623	10 DAP
TraesCS7D01G129700	Protein DETOXIFICATION	9.13122	13.7734	13.8317	2.41438	4.75234	4.28657	10 DAP
TraesCS7D01G099900	Disease resistance protein (TIR-NBS-LRR class) family	1.78783	1.73353	2.01225	0.831849	0.60028	0.84513	10 DAP
TraesCS7D01G131600	Glutathione S-transferase	0	0	0	2.76334	4.54983	5.13705	10 DAP
TraesCS7D01G129300	E3 ubiquitin-protein ligase	4.22568	3.50193	4.09213	1.23063	1.71471	2.42079	10 DAP
TraesCS7D01G091300	Oligosaccharyltransferase complex subunit ostc	10.3273	12.1153	8.30611	23.4817	24.4018	22.6137	10 DAP
TraesCS7D01G111800	GDSL esterase/lipase	13.8452	11.1339	15.6194	30.3307	25.4268	24.9063	10 DAP
TraesCS7D01G105100	Triose-phosphate transporter family protein	1.43773	0.878333	1.9078	0.546473	0.444099	0.55698	10 DAP
TraesCS7D01G130800	Protein DETOXIFICATION	1.06478	1.1738	0.837712	0	0	0	10 DAP
TraesCS7D01G111100	hydroxysteroid dehydrogenase 3	2.0952	1.86154	0.687866	4.68746	3.74624	3.46929	10 DAP
TraesCS7D01G100800	DNA repair radA-like protein	0.78352	0.802485	0.818781	2.23624	1.8766	1.8793	10 DAP
TraesCS7D01G084800	Carbonic anhydrase	1.25462	1.50824	1.89695	0	0	0	10 DAP
TraesCS7D01G086300	Protein arginine methyltransferase	5.99021	6.47539	5.34279	16.9925	10.7351	11.4529	10 DAP
TraesCS7D01G121200	Alpha/beta-Hydrolases superfamily protein	0.519047	0.507937	0.605684	4.14714	1.98212	2.31405	10 DAP
TraesCS7D01G108100	MYB-related transcription factor	1.9018	0.762932	0.403934	3.33772	4.58616	4.53888	15 DAP
TraesCS7D01G131500	Stomatal closure-related actin-binding protein 1	0.035421	0	0	1.48214	1.22834	1.63875	15 DAP
TraesCS7D01G122600	Glutamyl-tRNA reductase	1.78171	0.880312	2.91876	0.478947	0.843765	0.68283	15 DAP
TraesCS7D01G093500	F-box family protein	1.46656	2.1508	1.53222	0.453638	0.658474	0.388022	15 DAP
TraesCS7D01G116300	ABC transporter, putative	1.81015	1.11342	1.45027	0.406494	0.728633	0.622027	15 DAP
TraesCS7D01G108900	GDSL esterase/lipase	12.797	5.28934	13.9864	1.62915	3.06482	2.39109	15 DAP
TraesCS7D01G131600	Glutathione S-transferase	0	0.158879	0	2.42699	2.89392	2.34572	15 DAP
TraesCS7D01G094800	Myosin heavy chain-related-like	4.26464	1.50748	4.28098	0.964473	1.35985	0.967621	15 DAP
TraesCS7D01G118600	MYB-related transcription factor	0.670862	0.395091	0.055858	2.50707	2.17065	2.67417	15 DAP
TraesCS7D01G123600	Beta-1,3-N-acetylglucosaminyltransferase family protein	17.3525	6.29972	11.0774	33.9532	65.4935	46.7406	15 DAP
TraesCS7D01G093500	F-box family protein	2.03938	2.82708	2.24514	0.183969	0.243548	0.250091	20 DAP
TraesCS7D01G114200	ABC transporter, putative	1.25415	0.854651	1.28534	0.230953	0.133566	0.127989	20 DAP
TraesCS7D01G127400	Histone-lysine N-methyltransferase	0.46044	0.744098	0.43253	1.20326	1.59873	1.3282	20 DAP
TraesCS7D01G123400	Heparanase	2.01746	4.29522	3.69961	0.764083	1.01337	1.09371	20 DAP
TraesCS7D01G116300	ABC transporter, putative	0.762423	0.754584	0.813229	0.402697	0.280964	0.17059	20 DAP
TraesCS7D01G105900	Thiopurine S-methyltransferase, putative	1.9333	1.80567	1.59876	5.41628	3.54465	3.52648	20 DAP
TraesCS7D01G093200	GDSL esterase/lipase	18.2772	42.7974	39.8282	12.0632	6.97055	7.21582	20 DAP
TraesCS7D01G109100	GDSL esterase/lipase	20.3976	21.7692	38.0854	3.80278	3.29987	2.57728	20 DAP
TraesCS7D01G099300	Protein kinase	0.116647	0.116754	0.231922	0.63701	0.579312	0.673523	20 DAP
TraesCS7D01G121200	Alpha/beta-Hydrolases superfamily protein	2.74728	2.93666	2.34806	6.73237	5.65547	3.50686	20 DAP
TraesCS7D01G083700	Dimeric alpha-amylase inhibitor	4092.58	4176.32	3647	7742.51	7973.51	8693.6	20 DAP
TraesCS7D01G093500	F-box family protein	2.0569	1.93973	2.14148	0.51821	0.37864	0.652309	25 DAP
TraesCS7D01G130100	MYB transcription factor	13.3855	8.22524	13.8583	4.65384	3.96247	5.04273	25 DAP
TraesCS7D01G093200	GDSL esterase/lipase	25.5329	9.72138	24.1447	2.5298	4.24709	3.44721	25 DAP
TraesCS7D01G109100	GDSL esterase/lipase	15.8637	15.7734	35.5701	0.106308	0.333798	0.130075	25 DAP
TraesCS7D01G090800	Sec14p-like phosphatidylinositol transfer family protein	17.078	10.4838	15.1657	5.61502	5.41204	7.08506	25 DAP
TraesCS7D01G109200	GDSL esterase/lipase	14.6245	4.3222	17.3084	0	0	0	25 DAP
TraesCS7D01G114200	ABC transporter, putative	1.71704	0.896928	1.56372	0.622429	0.435994	0.354342	25 DAP
TraesCS7D01G123400	Heparanase	2.97617	2.03417	2.84875	1.30235	0.850195	0.939982	25 DAP
TraesCS7D01G129700	Protein DETOXIFICATION	4.91293	3.37855	3.32682	1.15893	1.49619	1.63884	25 DAP
TraesCS7D01G115300	ABC transporter, putative	0.213524	0.246404	0.181803	0.522809	0.570962	0.596966	25 DAP
TraesCS7D01G121200	Alpha/beta-Hydrolases superfamily protein	2.2717	5.5031	2.23351	5.83413	5.81772	7.75108	25 DAP
TraesCS7D01G097400	Xyloglucan endotransglucosylase/hydrolase	2.73699	3.13234	4.18082	0.666972	0.256076	0.548172	25 DAP
TraesCS7D01G119300	Lactate permease	5.90184	7.29042	9.36435	0.365761	1.06343	1.02186	25 DAP
TraesCS7D01G111800	GDSL esterase/lipase	51.5159	41.4395	48.5095	29.3456	28.476	29.5513	30 DAP
TraesCS7D01G091600	Peptide transporter	0	0.068209	0	1.24151	1.21356	1.1134	30 DAP
TraesCS7D01G133500	Alkaline alpha-galactosidase seed imbibition protein	8.4965	5.19402	9.37523	3.12639	2.39	2.73279	30 DAP
TraesCS7D01G089400	Zinc finger (Ran-binding) family protein	0.935891	1.00999	0.859322	2.89224	2.35471	3.06892	30 DAP
TraesCS7D01G133400	Calcium-binding EF-hand	5.4358	4.21001	5.87817	2.12526	2.22582	1.92623	30 DAP
TraesCS7D01G119300	Lactate permease	24.4026	34.3187	39.0544	1.94702	3.24127	2.42955	30 DAP
TraesCS7D01G127600	Ethylene-responsive transcription factor	49.3628	39.9395	73.3083	17.4474	19.1641	19.0804	30 DAP
TraesCS7D01G089000	Acetyl-coenzyme A synthetase	0.077509	0.054525	0	0.461215	0.367067	0.376377	30 DAP
TraesCS7D01G084100	Sulfate transporter	1.57579	1.15948	1.15958	5.66204	4.40951	4.85212	30 DAP
TraesCS7D01G133100	Debranching enzyme 1	2.01834	1.41381	1.56503	6.3909	6.37637	6.02401	30 DAP
